# Supplementary material
Source: Springer Nature journal article supplement (https://www.springermedizin.de/resource/supplementary/12985_2009_762_MOESM4_ESM.pdf/9608730)
Supplement: MOESM4 [file 9608730]

**(A)**

Banna virus (segment 7):

|          |                                                                                      | VP7        | ORFX    |
|----------|--------------------------------------------------------------------------------------|------------|---------|
| AF052013 | 5'-GUA-UAAAAUUUCAGCACCUGUCCAAUUUAGGAAACAUC-GUUUAAGAGUCGAUAUUG-CUUCAAUGAACAAUGGACAAGC | AUGAACAAUG | GACAAGC |
| AF052029 | 5'-GUA-UAAAAUUUCAGCACCUGUCCAAUUUAGGAAACAUC-GUUUAAGAGUCGAUAUUG-CUUCAAUGAACAAUGGACAAGC | AUGAACAAUG | GACAAGC |
| EU265701 | UAAAAUUCAUCGACCUGUCCAAUUUUGGAAACAUCUGUUUAAGAGUUGACGAAG-UCUCAAUGAACAAUGGACAAGC        | AUGAACAAUG | GACAAGC |
| AF052018 | 5'-GUAUUAAAAUUCAGC-AAUUGUCCAAUUUAGGAAACAUCUGUUUAAGAGUUGACAAGG-UCUCAAUGAAUAAUGGACAAGC | AUGAAUAAUG | GACAAGC |
| AF052035 | 5'-GUAUUAAAAUUCAUCGAACUGUCCAAUUUAGGAAACAUCUGUUUAAGAGUUGACGAAA-UCUCAAUGAACAAUGGACAAGC | AUGAACAAUG | GACAAGC |
| EU265689 | AAAAAUUCAUCGAAUUGUCCAAUUUUGGAAACAUCUGUUUAAGAGUUGAAAAAAUUCUCAAUGAACAAUGGACAGGC        | AUGAACAAUG | GACAGGC |

Kadipiro virus:

AF052023 5'-GUAGAAAUUUGUUGAGUGUAAGAUAUGUGUAA AUGUCAAUAUACAUAU GUU AUGGAUCCG

Liao ning virus (ORFX possibly absent):

AY317105 5'-GUUAUAAAAUUCUUAACUGAUUAACUGUUGCAA AUGGAUAUCCCGUCACCCAAUUGUGGU

AY701345 5'-GUUAUAAAAUUCUUAACUGACUAACUA AUGCAA AUGGAUAUCCCGUCACCCAAUUGUGGU

AY317105 UCGGUUCAGAAAAUUGUUUCCAAGUCUACAAAUCUC AAA AUGUGUACAGAGUGCGGUUC

AY701345 UCGGUUCAGAAAAUUGUUUCAAGUCUACAAAUCUC AAG AUGUGUACAGAGUGCGAUUC

**(B)**

AF052018 (nt 71..226) Banna virus  
 MDKQQLQEME EGSKSGVVTW TVTTPCHYQM LLVMIIFLIV LSLSLSVWAL IM
